# Supplementary material
Source: PubMed Central journal article supplement (PMC5976232)

## **Glycosylation profile of Immunoglobulin G is cross-sectionally associated with cardiovascular disease risk score and subclinical atherosclerosis in two independent cohorts**

Cristina Menni, PhD<sup>a\*</sup>, Ivan Gudelj, PhD<sup>b\*</sup>, Erin MacDonald-Dunlop, MSc<sup>c</sup>, Massimo Mangino, PhD<sup>a</sup>, Jonas Zierer, PhD<sup>a</sup>, Erim Besić, PhD<sup>d</sup>, Peter K Joshi, PhD<sup>c</sup>, Irena Trbojević-Akmačić, PhD<sup>b</sup>, Phil Chowienczyk, MD<sup>d</sup>, Tim D Spector, MD<sup>a</sup>, James F Wilson, PhD<sup>c,e</sup>, Gordan Lauc, PhD<sup>b,f\*\*</sup>, Ana M Valdes, PhD<sup>a,g,h\*\*</sup>

<sup>a</sup> Department of Twin Research and Genetic Epidemiology, King's College London, London, UK.

<sup>b</sup> Genos Glycoscience Research Laboratory, Zagreb, Croatia

<sup>c</sup> Centre for Global Health Research, Usher Institute of Population Health Sciences and Informatics, University of Edinburgh, Teviot Place, Edinburgh, EH8 9AG, Scotland

<sup>d</sup> Department of Clinical Pharmacology, King's College London, London, UK.

<sup>e</sup> MRC Human Genetics Unit, Institute of Genetics and Molecular Medicine, University of Edinburgh, Western General Hospital, Edinburgh, EH4 2XU, Scotland

<sup>f</sup> University of Zagreb, Faculty of Pharmacy and Biochemistry, Zagreb, Croatia

<sup>g</sup> School of Medicine, Nottingham City Hospital, Hucknall Road, Nottingham, UK.

<sup>h</sup> NIHR Nottingham Biomedical Research Centre, Nottingham, UK.

*Supplementary Material*

**OnlineTable I. Description of 24 quantitative IgG glycosylation traits and 52 derived trait and association between all tested glycans and derived traits with the 10-year ASCVD risk score in the discovery cohort. Analyses adjusted by age, BMI and family relatedness. Significance cut-off:  $P < 6.58 \times 10^{-4}$**

| GROUP                                 | Glycan | DESCRIPTION*                                                   | FORMULA*          | 10-year ASCVD risk score |          |
|---------------------------------------|--------|----------------------------------------------------------------|-------------------|--------------------------|----------|
|                                       |        |                                                                |                   | Beta(SE)                 | P        |
| Total IgG glycans (neutral + charged) | GP1    | <i>The percentage of FA1 glycan in total IgG glycans</i>       | $GP1 / GP^* 100$  | 0.002(0.01)              | 8.46E-01 |
|                                       | GP2    | <i>The percentage of A2 glycan in total IgG glycans</i>        | $GP2 / GP^* 100$  | 0.051(0.01)              | 3.45E-07 |
|                                       | GP4    | <i>The percentage of FA2 glycan in total IgG glycans</i>       | $GP4 / GP^* 100$  | -0.005(0.011)            | 6.36E-01 |
|                                       | GP5    | <i>The percentage of M5 glycan in total IgG glycans</i>        | $GP5 / GP^* 100$  | 0.037(0.01)              | 1.53E-04 |
|                                       | GP6    | <i>The percentage of FA2B glycan in total IgG glycans</i>      | $GP6 / GP^* 100$  | 0.072(0.011)             | 1.30E-10 |
|                                       | GP7    | <i>The percentage of A2G1 glycan in total IgG glycans</i>      | $GP7 / GP^* 100$  | 0.028(0.009)             | 2.52E-03 |
|                                       | GP8    | <i>The percentage of FA2[6]G1 glycan in total IgG glycans</i>  | $GP8 / GP^* 100$  | -0.046(0.009)            | 8.06E-07 |
|                                       | GP9    | <i>The percentage of FA2[3]G1 glycan in total IgG glycans</i>  | $GP9 / GP^* 100$  | -0.052(0.009)            | 1.76E-08 |
|                                       | GP10   | <i>The percentage of FA2[6]BG1 glycan in total IgG glycans</i> | $GP10 / GP^* 100$ | 0.048(0.009)             | 1.93E-07 |
|                                       | GP11   | <i>The percentage of FA2[3]BG1 glycan in total IgG glycans</i> | $GP11 / GP^* 100$ | 0.054(0.01)              | 3.42E-08 |
|                                       | GP12   | <i>The percentage of A2G2 glycan in total IgG glycans</i>      | $GP12 / GP^* 100$ | 0(0.01)                  | 9.66E-01 |
|                                       | GP13   | <i>The percentage of A2BG2 glycan in total IgG glycans</i>     | $GP13 / GP^* 100$ | -0.01(0.009)             | 2.80E-01 |
|                                       | GP14   | <i>The percentage of FA2G2 glycan in total IgG glycans</i>     | $GP14 / GP^* 100$ | -0.063(0.012)            | 1.49E-07 |

|                                               |                    |                                                                                                                             |                                                                                    |               |          |
|-----------------------------------------------|--------------------|-----------------------------------------------------------------------------------------------------------------------------|------------------------------------------------------------------------------------|---------------|----------|
|                                               | GP15               | <i>The percentage of FA2BG2 glycan in total IgG glycans</i>                                                                 | $GP15 / GP * 100$                                                                  | 0.005(0.011)  | 6.35E-01 |
|                                               | GP16               | <i>The percentage of FA2G1S1 glycan in total IgG glycans</i>                                                                | $GP16 / GP * 100$                                                                  | -0.049(0.009) | 1.32E-07 |
|                                               | GP17               | <i>The percentage of A2G2S1 glycan in total IgG glycans</i>                                                                 | $GP17 / GP * 100$                                                                  | 0.012(0.009)  | 1.84E-01 |
|                                               | GP18               | <i>The percentage of FA2G2S1 glycan in total IgG glycans</i>                                                                | $GP18 / GP * 100$                                                                  | -0.077(0.012) | 5.59E-11 |
|                                               | GP19               | <i>The percentage of FA2BG2S1 glycan in total IgG glycans</i>                                                               | $GP19 / GP * 100$                                                                  | -0.013(0.009) | 1.55E-01 |
|                                               | GP20+GP21          |                                                                                                                             | $(GP20+GP21)/GP * 100$                                                             | 0.017(0.009)  | 6.23E-02 |
|                                               | GP22               | <i>The percentage of A2BG2S2 glycan in total IgG glycans</i>                                                                | $GP22 / GP * 100$                                                                  | 0.022(0.009)  | 8.87E-03 |
|                                               | GP23               | <i>The percentage of FA2G2S2 glycan in total IgG glycans</i>                                                                | $GP23 / GP * 100$                                                                  | -0.071(0.01)  | 1.43E-13 |
|                                               | GP24               | <i>The percentage of FA2BG2S2 glycan in total IgG glycans</i>                                                               | $GP24 / GP * 100$                                                                  | -0.003(0.009) | 7.04E-01 |
| <i>Total IgG glycans - derived parameters</i> | FGS/(FG+FGS)       | <i>The percentage of sialylation of fucosylated galactosylated structures without bisecting GlcNAc in total IgG glycans</i> | $SUM(GP16 + GP18 + GP23) / SUM(GP16 + GP18 + GP23 + GP8 + GP9 + GP14) * 100$       | -0.034(0.01)  | 5.36E-04 |
|                                               | FBGS/(FBG+FBGS)    | <i>The percentage of sialylation of fucosylated galactosylated structures with bisecting GlcNAc in total IgG glycans</i>    | $SUM(GP19 + GP24) / SUM(GP19 + GP24 + GP10 + GP11 + GP15) * 100$                   | -0.031(0.009) | 4.26E-04 |
|                                               | FGS/(F+FG+FGS)     | <i>The percentage of sialylation of all fucosylated structures without bisecting GlcNAc in total IgG glycans</i>            | $SUM(GP16 + GP18 + GP23) / SUM(GP16 + GP18 + GP23 + GP4 + GP8 + GP9 + GP14) * 100$ | -0.042(0.011) | 1.31E-04 |
|                                               | FBGS/(FB+FBG+FBGS) | <i>The percentage of sialylation of all fucosylated structures with bisecting GlcNAc in total</i>                           | $SUM(GP19 + GP24) / SUM(GP19 + GP24 + GP6 + GP10 + GP11$                           | -0.042(0.009) | 4.47E-06 |

|                                         | IgG glycans                                                                                                             | + GP15)* 100                                               |               |          |
|-----------------------------------------|-------------------------------------------------------------------------------------------------------------------------|------------------------------------------------------------|---------------|----------|
| FG1S1/(FG1+FG1S1)                       | The percentage of monosialylation of fucosylated monogalactosylated structures in total IgG glycans                     | $GP16 / \text{SUM}(GP16 + GP8 + GP9) * 100$                | -0.005(0.009) | 5.89E-01 |
| FG2S1/(FG2+FG2S1+FG2S2)                 | The percentage of monosialylation of fucosylated digalactosylated structures in total IgG glycans                       | $GP18 / \text{SUM}(GP18 + GP14 + GP23) * 100$              | -0.021(0.009) | 1.93E-02 |
| FG2S2/(FG2+FG2S1+FG2S2)                 | The percentage of disialylation of fucosylated digalactosylated structures in total IgG glycans                         | $GP23 / \text{SUM}(GP23 + GP14 + GP18) * 100$              | -0.027(0.009) | 2.99E-03 |
| FBG2S1/(FBG2+FBG2S1+FBG2S2)             | The percentage of monosialylation of fucosylated digalactosylated structures with bisecting GlcNAc in total IgG glycans | $GP19 / \text{SUM}(GP19 + GP15 + GP24) * 100$              | -0.018(0.009) | 5.64E-02 |
| FBG2S2/(FBG2+FBG2S1+FBG2S2)             | The percentage of disialylation of fucosylated digalactosylated structures with bisecting GlcNAc in total IgG glycans   | $GP24 / \text{SUM}(GP24 + GP15 + GP19) * 100$              | -0.001(0.009) | 9.00E-01 |
| $F^{\text{total}}S1/F^{\text{total}}S2$ | Ratio of all fucosylated (+/- bisecting GlyNAc) monosialylated and disialylated structures in total IgG glycans         | $\text{SUM}(GP16 + GP18 + GP19) / \text{SUM}(GP23 + GP24)$ | -0.009(0.009) | 3.29E-01 |
| $FS1/FS2$                               | Ratio of fucosylated (without bisecting GlcNAc) monosialylated and disialylated structures in total IgG glycans         | $\text{SUM}(GP16 + GP18) / GP23$                           | 0.028(0.009)  | 1.50E-03 |

|                            |                                               |                                                                                                                     |                                              |              |          |
|----------------------------|-----------------------------------------------|---------------------------------------------------------------------------------------------------------------------|----------------------------------------------|--------------|----------|
|                            | <b>FBS1/FBS2</b>                              | <i>Ratio of fucosylated (with bisecting GlcNAc) monosialylated and disialylated structures in total IgG glycans</i> | $GP19 / GP24$                                | -0.01(0.009) | 2.65E-01 |
|                            | <b>FBS<sup>total</sup>/FS<sup>total</sup></b> | <i>Ratio of all fucosylated sialylated structures with and without bisecting GlcNAc</i>                             | $SUM(GP19 + GP24) / SUM(GP16 + GP18 + GP23)$ | 0.053(0.01)  | 4.18E-07 |
|                            | <b>FBS1/FS1</b>                               | <i>Ratio of fucosylated monosialylated structures with and without bisecting GlcNAc</i>                             | $GP19 / SUM(GP16 + GP18)$                    | 0.041(0.01)  | 6.08E-05 |
|                            | <b>FBS1/(FS1+FBS1)</b>                        | <i>The incidence of bisecting GlcNAc in all fucosylated monosialylated structures in total IgG glycans</i>          | $GP19 / SUM(GP16 + GP18 + GP19)$             | 0.042(0.01)  | 5.97E-05 |
|                            | <b>FBS2/FS2</b>                               | <i>Ratio of fucosylated disialylated structures with and without bisecting GlcNAc</i>                               | $GP24 / GP23$                                | 0.101(0.01)  | 9.48E-23 |
|                            | <b>FBS2/(FS2+FBS2)</b>                        | <i>The incidence of bisecting GlcNAc in all fucosylated disialylated structures in total IgG glycans</i>            | $GP24 / SUM(GP23 + GP24)$                    | 0.101(0.011) | 2.23E-21 |
| <i>Neutral IgG glycans</i> | <b>GP1<sup>n</sup></b>                        | <i>The percentage of FA1 glycan in total neutral IgG glycans (GP<sup>n</sup>)</i>                                   | $GP1 / GP^n * 100$                           | 0.009(0.01)  | 3.48E-01 |
|                            | <b>GP2<sup>n</sup></b>                        | <i>The percentage of A2 glycan in total neutral IgG glycans (GP<sup>n</sup>)</i>                                    | $GP2 / GP^n * 100$                           | 0.055(0.01)  | 3.34E-08 |
|                            | <b>GP4<sup>n</sup></b>                        | <i>The percentage of FA2 glycan in total neutral IgG glycans (GP<sup>n</sup>)</i>                                   | $GP4 / GP^n * 100$                           | 0.007(0.012) | 5.32E-01 |
|                            | <b>GP5<sup>n</sup></b>                        | <i>The percentage of M5 glycan in total neutral IgG glycans (GP<sup>n</sup>)</i>                                    | $GP5 / GP^n * 100$                           | 0.046(0.01)  | 2.01E-06 |

|  |                                                 |                                                                                         |                                                                                  |                      |               |          |
|--|-------------------------------------------------|-----------------------------------------------------------------------------------------|----------------------------------------------------------------------------------|----------------------|---------------|----------|
|  | GP6 <sup>n</sup>                                | <i>The percentage of FA2B glycan in total neutral IgG glycans (GP<sup>n</sup>)</i>      | $GP6 / GP^n * 100$                                                               | 0.096(0.012)         | 7.93E-17      |          |
|  | GP7 <sup>n</sup>                                | <i>The percentage of A2G1 glycan in total neutral IgG glycans (GP<sup>n</sup>)</i>      | $GP7 / GP^n * 100$                                                               | 0.032(0.009)         | 5.28E-04      |          |
|  | GP8 <sup>n</sup>                                | <i>The percentage of FA2[6]G1 glycan in total neutral IgG glycans (GP<sup>n</sup>)</i>  | $GP8 / GP^n * 100$                                                               | -0.044(0.01)         | 4.31E-06      |          |
|  | GP9 <sup>n</sup>                                | <i>The percentage of FA2[3]G1 glycan in total neutral IgG glycans (GP<sup>n</sup>)</i>  | $GP9 / GP^n * 100$                                                               | -0.047(0.009)        | 2.58E-07      |          |
|  | GP10 <sup>n</sup>                               | <i>The percentage of FA2[6]BG1 glycan in total neutral IgG glycans (GP<sup>n</sup>)</i> | $GP10 / GP^n * 100$                                                              | 0.062(0.009)         | 1.99E-11      |          |
|  | GP11 <sup>n</sup>                               | <i>The percentage of FA2[3]BG1 glycan in total neutral IgG glycans (GP<sup>n</sup>)</i> | $GP11 / GP^n * 100$                                                              | 0.067(0.01)          | 4.19E-12      |          |
|  | GP12 <sup>n</sup>                               | <i>The percentage of A2G2 glycan in total neutral IgG glycans (GP<sup>n</sup>)</i>      | $GP12 / GP^n * 100$                                                              | 0.006(0.01)          | 5.30E-01      |          |
|  | GP13 <sup>n</sup>                               | <i>The percentage of A2BG2 glycan in total neutral IgG glycans (GP<sup>n</sup>)</i>     | $GP13 / GP^n * 100$                                                              | 0.003(0.01)          | 7.79E-01      |          |
|  | GP14 <sup>n</sup>                               | <i>The percentage of FA2G2 glycan in total neutral IgG glycans (GP<sup>n</sup>)</i>     | $GP14 / GP^n * 100$                                                              | -0.047(0.012)        | 9.50E-05      |          |
|  | GP15 <sup>n</sup>                               | <i>The percentage of FA2BG2 glycan in total neutral IgG glycans (GP<sup>n</sup>)</i>    | $GP15 / GP^n * 100$                                                              | 0.017(0.011)         | 1.14E-01      |          |
|  | <i>Neutral IgG glycans - derived parameters</i> | G0 <sup>n</sup>                                                                         | <i>The percentage of agalactosylated structures in total neutral IgG glycans</i> | $SUM(GP1^n: GP6^n)$  | 0.036(0.012)  | 3.07E-03 |
|  |                                                 | G1 <sup>n</sup>                                                                         | <i>The percentage of</i>                                                         | $SUM(GP7^n: GP11^n)$ | -0.026(0.009) | 4.69E-03 |

|                                             |                                                                                                         |                                                                                          |               |          |
|---------------------------------------------|---------------------------------------------------------------------------------------------------------|------------------------------------------------------------------------------------------|---------------|----------|
|                                             | <i>monogalactosylated structures in total neutral IgG glycans</i>                                       |                                                                                          |               |          |
| <b>G2<sup>n</sup></b>                       | <i>The percentage of digalactosylated structures in total neutral IgG glycans</i>                       | $SUM(GP12^n: GP15^n)$                                                                    | -0.037(0.012) | 1.72E-03 |
| <b>F<sup>n total</sup></b>                  | <i>The percentage of all fucosylated (+/- bisecting GlcNAc) structures in total neutral IgG glycans</i> | $SUM(GP1^n + GP4^n + GP5^n + GP6^n + GP8^n + GP9^n + GP10^n + GP11^n + GP14^n + GP15^n)$ | -0.028(0.009) | 1.55E-03 |
| <b>FG0<sup>n total</sup>/G0<sup>n</sup></b> | <i>The percentage of fucosylation of agalactosylated structures</i>                                     | $SUM(GP1^n + GP4^n + GP5^n + GP6^n) / G0^n * 100$                                        | -0.038(0.008) | 6.61E-06 |
| <b>FG1<sup>n total</sup>/G1<sup>n</sup></b> | <i>The percentage of fucosylation of monogalactosylated structures</i>                                  | $SUM(GP8^n + GP9^n + GP10^n + GP11^n) / G1^n * 100$                                      | -0.031(0.009) | 4.04E-04 |
| <b>FG2<sup>n total</sup>/G2<sup>n</sup></b> | <i>The percentage of fucosylation of digalactosylated structures</i>                                    | $SUM(GP14^n + GP15^n) / G2^n * 100$                                                      | -0.026(0.009) | 3.56E-03 |
| <b>F<sup>n</sup></b>                        | <i>The percentage of fucosylated (without bisecting GlcNAc) structures in total neutral IgG glycans</i> | $SUM(GP1^n + GP4^n + GP5^n + GP8^n + GP9^n + GP14^n)$                                    | -0.084(0.009) | 3.68E-19 |
| <b>FG0<sup>n</sup>/G0<sup>n</sup></b>       | <i>The percentage of fucosylation (without bisecting GlcNAc) of agalactosylated structures</i>          | $SUM(GP1^n + GP4^n + GP5^n) / G0^n * 100$                                                | -0.074(0.009) | 2.22E-16 |
| <b>FG1<sup>n</sup>/G1<sup>n</sup></b>       | <i>The percentage of fucosylation (without bisecting GlcNAc) of monogalactosylated structures</i>       | $SUM(GP8^n + GP9^n) / G1^n * 100$                                                        | -0.082(0.009) | 1.60E-18 |

|                                                       |                                                                                                      |                                         |              |          |
|-------------------------------------------------------|------------------------------------------------------------------------------------------------------|-----------------------------------------|--------------|----------|
|                                                       | <i>The percentage of fucosylation (without bisecting GlcNAc) of digalactosylated structures</i>      |                                         |              |          |
| <b>FG2<sup>n</sup>/G2<sup>n</sup></b>                 |                                                                                                      | $GP14^n / G2^n * 100$                   | -0.058(0.01) | 1.51E-09 |
|                                                       | <i>The percentage of fucosylated (with bisecting GlcNAc) structures in total neutral IgG glycans</i> |                                         |              |          |
| <b>FB<sup>n</sup></b>                                 |                                                                                                      | $SUM(GP6^n + GP10^n + GP11^n + GP15^n)$ | 0.09(0.01)   | 7.75E-20 |
|                                                       | <i>The percentage of fucosylation (with bisecting GlcNAc) of agalactosylated structures</i>          |                                         |              |          |
| <b>FBG0<sup>n</sup>/G0<sup>n</sup></b>                |                                                                                                      | $GP6^n / G0^n * 100$                    | 0.073(0.009) | 4.22E-15 |
|                                                       | <i>The percentage of fucosylation (with bisecting GlcNAc) of monogalactosylated structures</i>       |                                         |              |          |
| <b>FBG1<sup>n</sup>/G1<sup>n</sup></b>                |                                                                                                      | $SUM(GP10^n + GP11^n) / G1^n * 100$     | 0.08(0.01)   | 5.72E-17 |
|                                                       | <i>The percentage of fucosylation (with bisecting GlcNAc) of digalactosylated structures</i>         |                                         |              |          |
| <b>FBG2<sup>n</sup>/G2<sup>n</sup></b>                |                                                                                                      | $GP15^n / G2^n * 100$                   | 0.072(0.01)  | 1.90E-12 |
|                                                       | <i>Ratio of fucosylated structures with and without bisecting GlcNAc</i>                             |                                         |              |          |
| <b>FB<sup>n</sup>/F<sup>n</sup></b>                   |                                                                                                      | $FB^n / F^n * 100$                      | 0.09(0.01)   | 3.70E-20 |
|                                                       | <i>The incidence of bisecting GlcNAc in all fucosylated structures in total neutral IgG glycans</i>  |                                         |              |          |
| <b>FB<sup>n</sup>/F<sup>n total</sup></b>             |                                                                                                      | $FB^n / F^{n total} * 100$              | 0.09(0.01)   | 6.23E-20 |
|                                                       | <i>Ratio of fucosylated non-bisecting GlcNAc structures and all structures with bisecting GlcNAc</i> |                                         |              |          |
| <b>F<sup>n</sup>/(B<sup>n</sup> + FB<sup>n</sup>)</b> |                                                                                                      | $F^n / (GP13^n + FB^n)$                 | -0.089(0.01) | 7.74E-20 |
|                                                       | <i>Ratio of structures with bisecting GlcNAc and all fucosylated structures (+/-</i>                 |                                         |              |          |
| <b>B<sup>n</sup>/(F<sup>n</sup> + FB<sup>n</sup>)</b> |                                                                                                      | $GP13^n / (F^n + FB^n) * 1000$          | 0.004(0.009) | 6.61E-01 |



|                                                |                                                                                                                                          |                                                        |              |          |
|------------------------------------------------|------------------------------------------------------------------------------------------------------------------------------------------|--------------------------------------------------------|--------------|----------|
|                                                | <i>bisecting GlcNAc)</i>                                                                                                                 |                                                        |              |          |
| $\text{FBG2}^n/\text{FG2}^n$                   | <i>Ratio of fucosylated digalactosylated structures with and without bisecting GlcNAc</i>                                                | $\text{GP15}^n/\text{GP14}^n$                          | 0.074(0.01)  | 4.86E-13 |
| $\text{FBG2}^n/(\text{FG2}^n + \text{FBG2}^n)$ | <i>The incidence of bisecting GlcNAc in all fucosylated digalactosylated structures in total neutral IgG glycans</i>                     | $\text{GP15}^n/(\text{GP14}^n + \text{GP15}^n) * 100$  | 0.074(0.01)  | 5.73E-13 |
| $\text{FG2}^n/(\text{BG2}^n + \text{FBG2}^n)$  | <i>Ratio of fucosylated digalactosylated non-bisecting GlcNAc structures and all digalactosylated structures with bisecting GlcNAc</i>   | $\text{GP14}^n/(\text{GP13}^n + \text{GP15}^n)$        | -0.074(0.01) | 1.23E-12 |
| $\text{BG2}^n/(\text{FG2}^n + \text{FBG2}^n)$  | <i>Ratio of digalactosylated structures with bisecting GlcNAc and all fucosylated digalactosylated structures (+/- bisecting GlcNAc)</i> | $\text{GP15}^n/(\text{GP14}^n + \text{GP15}^n) * 1000$ | 0.038(0.01)  | 2.18E-04 |

\*Previously published in Lauc *et al.* 2013

**Online Table II. Descriptive characteristics of the male population included in the validation analysis.**

| <b>Phenotype</b>                 | <b>TwinsUK</b><br>Mean(SD) | <b>ORCADES</b><br>Mean(SD) |
|----------------------------------|----------------------------|----------------------------|
| <b>n</b>                         | 189                        | 656                        |
| <b>Males %</b>                   | 100%                       | 100%                       |
| <b>Age</b>                       | 57.21(10.88)               | 54.51(14.76)               |
| <b>10-years ASCVD Risk Score</b> | 11.04(9.29)                | 12.19(13.59)               |
| <b>BMI</b>                       | 26.70(3.71)                | 28.03(5.51)                |
| <b>DBP, mmHG</b>                 | 82.03(9.79)                | 72.67(9.23)                |
| <b>HDL Cholesterol, mmol/l</b>   | 1.24(0.35)                 | 1.33(0.37)                 |
| <b>SBP, mmHG</b>                 | 133.19(16.13)              | 132.07(16.26)              |
| <b>Current smokers,%</b>         | 2.65%                      | 8.52%                      |
| <b>Total Cholesterol, mmol/l</b> | 5.24(1.20)                 | 5.32(1.12)                 |
| <b>T2D, %</b>                    | 0%                         | 4.71%                      |

**Online Table III. Glycan traits associated with the 10-years ASCVD risk score and their association with smoking, HDL and total cholesterol, systolic blood pressure, type 2 diabetes and insulin resistance adjusting for age, BMI and family relatedness in the discovery cohort.**

| Glycan                  | ASCVD           |                        | SMK             |                        | HDL             |                        | TC              |                        | SBP             |                       | T2D             |                       | HOMA            |                        |
|-------------------------|-----------------|------------------------|-----------------|------------------------|-----------------|------------------------|-----------------|------------------------|-----------------|-----------------------|-----------------|-----------------------|-----------------|------------------------|
|                         | Beta (SE)       | P                      | Beta (SE)       | P                      | Beta (SE)       | P                      | Beta (SE)       | P                      | Beta (SE)       | P                     | Beta (SE)       | P                     | Beta (SE)       | P                      |
| <b>GP6</b>              | 0.07<br>(0.01)  | 1.30x10 <sup>-10</sup> | 0.52<br>(0.08)  | 2.08x10 <sup>-10</sup> | -0.04<br>(0.01) | 4.07x10 <sup>-6</sup>  | 0.07<br>(0.03)  | 1.51x10 <sup>-2</sup>  | -0.13<br>(0.34) | 7.01x10 <sup>-1</sup> | 0.18<br>(0.14)  | 1.90x10 <sup>-1</sup> | 0.06<br>(0.02)  | 9.63x10 <sup>-4</sup>  |
| <b>GP14</b>             | -0.06<br>(0.01) | 1.49x10 <sup>-7</sup>  | -0.13<br>(0.1)  | 1.80x10 <sup>-1</sup>  | 0.03<br>(0.01)  | 7.50x10 <sup>-4</sup>  | -0.15<br>(0.03) | 9.48x10 <sup>-8</sup>  | -0.21<br>(0.36) | 5.56x10 <sup>-1</sup> | -0.11<br>(0.19) | 5.71x10 <sup>-1</sup> | -0.03<br>(0.02) | 1.91x10 <sup>-1</sup>  |
| <b>GP18</b>             | -0.08<br>(0.01) | 5.59x10 <sup>-11</sup> | -0.19<br>(0.09) | 4.71x10 <sup>-2</sup>  | 0.05<br>(0.01)  | 8.92x10 <sup>-8</sup>  | -0.15<br>(0.03) | 2.94x10 <sup>-8</sup>  | -0.32<br>(0.35) | 3.55x10 <sup>-1</sup> | -0.13<br>(0.16) | 3.92x10 <sup>-1</sup> | -0.05<br>(0.02) | 4.20x10 <sup>-3</sup>  |
| <b>FGS/(F+FG+FGS)</b>   | -0.04<br>(0.01) | 1.31x10 <sup>-4</sup>  | -0.01<br>(0.09) | 8.71x10 <sup>-1</sup>  | 0.05<br>(0.01)  | 1.27x10 <sup>-8</sup>  | -0.06<br>(0.03) | 2.10x10 <sup>-2</sup>  | -0.35<br>(0.33) | 2.77x10 <sup>-1</sup> | -0.01<br>(0.14) | 9.40x10 <sup>-1</sup> | -0.07<br>(0.02) | 3.15x10 <sup>-5</sup>  |
| <b>FBStotal/FStotal</b> | 0.05<br>(0.01)  | 4.18x10 <sup>-7</sup>  | 0.22<br>(0.09)  | 1.03x10 <sup>-2</sup>  | -0.03<br>(0.01) | 1.31x10 <sup>-3</sup>  | 0.08<br>(0.02)  | 8.22x10 <sup>-4</sup>  | -0.14<br>(0.31) | 6.46x10 <sup>-1</sup> | 0.07<br>(0.15)  | 6.66x10 <sup>-1</sup> | 0.01<br>(0.02)  | 7.19x10 <sup>-1</sup>  |
| <b>FBS1/FS1</b>         | 0.04<br>(0.01)  | 6.08x10 <sup>-5</sup>  | 0.12<br>(0.08)  | 1.62x10 <sup>-1</sup>  | -0.03<br>(0.01) | 4.25x10 <sup>-4</sup>  | 0.07<br>(0.02)  | 3.56x10 <sup>-3</sup>  | -0.1<br>(0.31)  | 7.50x10 <sup>-1</sup> | 0.01<br>(0.15)  | 9.38x10 <sup>-1</sup> | 0.02<br>(0.02)  | 3.27x10 <sup>-1</sup>  |
| <b>FBS1/(FS1+FBS1)</b>  | 0.04<br>(0.01)  | 5.97x10 <sup>-5</sup>  | 0.11<br>(0.08)  | 1.76x10 <sup>-1</sup>  | -0.03<br>(0.01) | 5.63x10 <sup>-4</sup>  | 0.07<br>(0.02)  | 2.55x10 <sup>-3</sup>  | -0.11<br>(0.31) | 7.24x10 <sup>-1</sup> | 0.01<br>(0.16)  | 9.31x10 <sup>-1</sup> | 0.02<br>(0.02)  | 3.36x10 <sup>-1</sup>  |
| <b>GP6n</b>             | 0.1<br>(0.01)   | 7.93x10 <sup>-17</sup> | 0.73<br>(0.09)  | 3.33x10 <sup>-15</sup> | -0.04<br>(0.01) | 4.85x10 <sup>-5</sup>  | 0.13<br>(0.03)  | 5.57x10 <sup>-6</sup>  | -0.24<br>(0.35) | 4.99x10 <sup>-1</sup> | 0.28<br>(0.16)  | 7.94x10 <sup>-2</sup> | 0.04<br>(0.02)  | 3.19x10 <sup>-2</sup>  |
| <b>GP9n</b>             | -0.05<br>(0.01) | 2.58x10 <sup>-7</sup>  | -0.54<br>(0.06) | 6.40x10 <sup>-18</sup> | 0.02<br>(0.01)  | 1.43x10 <sup>-2</sup>  | 0.02<br>(0.02)  | 3.25x10 <sup>-1</sup>  | 0.27<br>(0.27)  | 3.23x10 <sup>-1</sup> | -0.18<br>(0.12) | 1.23x10 <sup>-1</sup> | -0.02<br>(0.01) | 3.02x10 <sup>-1</sup>  |
| <b>GP14n</b>            | -0.05<br>(0.01) | 9.50x10 <sup>-5</sup>  | -0.01<br>(0.1)  | 9.31x10 <sup>-1</sup>  | 0.04<br>(0.01)  | 2.03x10 <sup>-5</sup>  | -0.1<br>(0.03)  | 8.11x10 <sup>-4</sup>  | -0.29<br>(0.36) | 4.24x10 <sup>-1</sup> | -0.05<br>(0.16) | 7.76x10 <sup>-1</sup> | -0.05<br>(0.02) | 6.75x10 <sup>-3</sup>  |
| <b>GlycA*</b>           | 0.13<br>(0.01)  | 9.34x10 <sup>-21</sup> | 0.24<br>(0.09)  | 9.39x10 <sup>-3</sup>  | -0.09<br>(0.01) | 3.31x10 <sup>-14</sup> | 0.23<br>(0.03)  | 9.70x10 <sup>-12</sup> | 1.06<br>(0.42)  | 0.01                  | 0.55<br>(0.17)  | 1.30x10 <sup>-3</sup> | 0.13<br>(0.02)  | 5.10x10 <sup>-13</sup> |

ASCVD=10-year atherosclerotic cardiovascular disease risk score adjusting for age, BMI and family relatedness; SMK= smoking, HDL= HDL cholesterol, TC= total cholesterol, SBP= systolic blood pressure; T2D=type 2 diabetes; HOMA=insulin resistance. \*GlycA was measured in mmol/L by the NMR metabolomics provider Nightingale inc under the name GP. GlycA has been standardised to have mean 0 and SD 1.

**Online Table IV. Association of glycan traits with the 10-year ASCVD risk score overall and adjusting for smoking, HDL cholesterol, total cholesterol and HOMA respectively in the discovery cohort.**

| Glycan                  | ASCVD           |                         | ASCVD_adj_SMK   |                        | ASCVD_adj_HDL   |                        | ASCVD_adj_TC    |                        | ASCVD_adj_HOMA  |                        |
|-------------------------|-----------------|-------------------------|-----------------|------------------------|-----------------|------------------------|-----------------|------------------------|-----------------|------------------------|
|                         | Beta (SE)       | P                       | Beta (SE)       | P                      | Beta (SE)       | P                      | Beta (SE)       | P                      | Beta (SE)       | P                      |
| <b>GP6</b>              | 0.07<br>(0.01)  | 1.30x10 <sup>-10</sup>  | 0.05<br>(0.01)  | 4.68x10 <sup>-7</sup>  | 0.05<br>(0.01)  | 4.58x10 <sup>-7</sup>  | 0.06<br>(0.01)  | 4.54x10 <sup>-9</sup>  | 0.05<br>(0.01)  | 1.57x10 <sup>-4</sup>  |
| <b>GP14</b>             | -0.06<br>(0.01) | 1.49x10 <sup>-7</sup>   | -0.06<br>(0.01) | 6.18x10 <sup>-9</sup>  | -0.05<br>(0.01) | 1.39x10 <sup>-5</sup>  | -0.04<br>(0.01) | 1.84x10 <sup>-4</sup>  | -0.05<br>(0.01) | 9.02x10 <sup>-4</sup>  |
| <b>GP18</b>             | -0.08<br>(0.01) | 5.59x10 <sup>-11</sup>  | -0.07<br>(0.01) | 1.86x10 <sup>-11</sup> | -0.05<br>(0.01) | 6.31x10 <sup>-7</sup>  | -0.06<br>(0.01) | 4.03x10 <sup>-7</sup>  | -0.06<br>(0.01) | 1.24x10 <sup>-5</sup>  |
| <b>FGS/(F+FG+FGS)</b>   | -0.04<br>(0.01) | 1.31x10 <sup>-4</sup>   | -0.04<br>(0.01) | 2.96x10 <sup>-5</sup>  | -0.02<br>(0.01) | 5.59x10 <sup>-2</sup>  | -0.03<br>(0.01) | 1.11x10 <sup>-3</sup>  | -0.02<br>(0.01) | 9.62x10 <sup>-2</sup>  |
| <b>FBStotal/FStotal</b> | 0.05<br>(0.01)  | 4.18x10 <sup>-7</sup>   | 0.05<br>(0.01)  | 1.12x10 <sup>-6</sup>  | 0.04<br>(0.01)  | 2.55x10 <sup>-5</sup>  | 0.04<br>(0.01)  | 2.73x10 <sup>-5</sup>  | 0.05<br>(0.01)  | 2.13x10 <sup>-5</sup>  |
| <b>FBS1/FS1</b>         | 0.04<br>(0.01)  | 6.08x10 <sup>-5</sup>   | 0.04<br>(0.01)  | 1.87x10 <sup>-5</sup>  | 0.03<br>(0.01)  | 2.72x10 <sup>-3</sup>  | 0.03<br>(0.01)  | 1.20x10 <sup>-3</sup>  | 0.04<br>(0.01)  | 8.25x10 <sup>-4</sup>  |
| <b>FBS1/(FS1+FBS1)</b>  | 0.04<br>(0.01)  | 5.97x10 <sup>-5</sup>   | 0.04<br>(0.01)  | 1.56x10 <sup>-5</sup>  | 0.03<br>(0.01)  | 2.43x10 <sup>-3</sup>  | 0.03<br>(0.01)  | 1.34x10 <sup>-3</sup>  | 0.04<br>(0.01)  | 1.01x10 <sup>-3</sup>  |
| <b>GP6n</b>             | 0.1<br>(0.01)   | 7.93x10 <sup>-17</sup>  | 0.07<br>(0.01)  | 5.69x10 <sup>-11</sup> | 0.08<br>(0.01)  | 2.90x10 <sup>-13</sup> | 0.08<br>(0.01)  | 6.75x10 <sup>-13</sup> | 0.08<br>(0.01)  | 7.35x10 <sup>-9</sup>  |
| <b>GP9n</b>             | -0.05<br>(0.01) | 2.58x10 <sup>-7</sup>   | -0.02<br>(0.01) | 9.94x10 <sup>-3</sup>  | -0.04<br>(0.01) | 6.14x10 <sup>-6</sup>  | -0.05<br>(0.01) | 6.92x10 <sup>-9</sup>  | -0.05<br>(0.01) | 2.30x10 <sup>-6</sup>  |
| <b>GP14n</b>            | -0.05<br>(0.01) | 9.50x10 <sup>-5</sup>   | -0.05<br>(0.01) | 3.02x10 <sup>-6</sup>  | -0.03<br>(0.01) | 1.08x10 <sup>-2</sup>  | -0.03<br>(0.01) | 3.10x10 <sup>-3</sup>  | -0.02<br>(0.01) | 9.85x10 <sup>-2</sup>  |
| <b>GlycA</b>            | 0.13<br>(0.01)  | 9.34 x10 <sup>-21</sup> | 0.11<br>(0.01)  | 1.19x10 <sup>-16</sup> | 0.09<br>(0.01)  | 2.27x10 <sup>-11</sup> | 0.11<br>(0.01)  | 4.35x10 <sup>-15</sup> | 0.11<br>(0.02)  | 2.33x10 <sup>-12</sup> |

ASCVD=10-year atherosclerotic cardiovascular disease risk score adjusting for age, BMI and family relatedness; ASCVD\_adj\_SMK= 10-years ASCVD score adjusting for age, BMI, family relatedness and smoking, ASCVD\_adj\_HDL= 10-years ASCVD score adjusting for age, BMI, family relatedness and HDL cholesterol, ASCVD\_adj\_TC= 10-years ASCVD score adjusting for age, BMI, family relatedness and total cholesterol, ASCVD\_adj\_HOMA2IR= 10-years ASCVD score adjusting for age, BMI, family relatedness and HOMA2IR. Glycan traits in italics do not remain statistically significant after adjustment

for individual risk factors. \*GlycA was measured in mmol/L by the NMR metabolomics provider Nightingale inc under the name GP. GlycA has been standardised to have mean 0 and SD 1.

Online Table V. Glycan traits associated with the 10-year ASCVD risk score and their association with femoral and carotid plaque in TwinsUK females.

| Glycan                                        | Femoral plaque |                             | Femoral plaque adj SMK |              | Carotid plaque |                             | Carotid plaque adj SMK |                             |
|-----------------------------------------------|----------------|-----------------------------|------------------------|--------------|----------------|-----------------------------|------------------------|-----------------------------|
|                                               | Beta(SE)       | P                           | Beta(SE)               | P            | Beta(SE)       | P                           | Beta(SE)               | P                           |
| <b>GP6</b>                                    | 0.387(0.152)   | <b>0.01</b>                 | 0.359(0.158)           | <b>0.02</b>  | 0.467(0.154)   | <b>2.40x10<sup>-3</sup></b> | 0.453(0.157)           | <b>3.92x10<sup>-3</sup></b> |
| <b>GP14</b>                                   | -0.174(0.165)  | 0.29                        | -0.177(0.166)          | 0.29         | -0.213(0.155)  | 0.17                        | -0.221(0.156)          | 0.16                        |
| <b>GP18</b>                                   | -0.128(0.162)  | 0.43                        | -0.144(0.165)          | 0.38         | -0.494(0.147)  | <b>7.70x10<sup>-4</sup></b> | -0.524(0.152)          | <b>5.81x10<sup>-4</sup></b> |
| <b>FBS<sub>total</sub>/FS<sub>total</sub></b> | 0.021(0.149)   | 0.89                        | 0.022(0.149)           | 0.89         | 0.173(0.133)   | 0.19                        | 0.177(0.132)           | 0.18                        |
| <b>FBS1/FS1</b>                               | -0.03(0.148)   | 0.84                        | -0.003(0.15)           | 0.98         | 0.123(0.127)   | 0.33                        | 0.154(0.13)            | 0.23                        |
| <b>FBS1/(FS1+FBS1)</b>                        | -0.041(0.149)  | 0.78                        | -0.014(0.152)          | 0.93         | 0.12(0.13)     | 0.35                        | 0.152(0.133)           | 0.25                        |
| <b>GP6<sub>n</sub></b>                        | 0.48(0.154)    | <b>1.88x10<sup>-3</sup></b> | 0.427(0.159)           | <b>0.01</b>  | 0.39(0.152)    | <b>0.01</b>                 | 0.347(0.155)           | <b>0.03</b>                 |
| <b>GP9<sub>n</sub></b>                        | -0.252(0.128)  | <b>0.05</b>                 | -0.211(0.129)          | 0.10         | -0.297(0.119)  | <b>0.01</b>                 | -0.264(0.121)          | <b>0.03</b>                 |
| <b>GlycA*</b>                                 | 0.317(0.105)   | <b>0.002</b>                | 0.313(0.107)           | <b>0.003</b> | 0.194(0.099)   | <b>0.05</b>                 | 0.298(0.15)            | <b>0.049</b>                |

\*GlycA was measured in mmol/L by the NMR metabolomics provider Nightingale inc under the name GP. GlycA has been standardised to have mean 0 and SD 1.

Online Table VI. Pearson's correlation and p-value between the 8 IgG glycans reproducibly and the NMR GlycA measure in TwinsUK

| Pearson Correlations                         | GlycA*                         | GP6                             | GP14                            | GP18                          | FBS <sub>total</sub> /F <sub>total</sub> | FBS1/FS1                       | FBS1/(FS1+FBS1)                | GP6n                           | GP9n |
|----------------------------------------------|--------------------------------|---------------------------------|---------------------------------|-------------------------------|------------------------------------------|--------------------------------|--------------------------------|--------------------------------|------|
| <b>GlycA</b>                                 | 1                              |                                 |                                 |                               |                                          |                                |                                |                                |      |
| <b>GP6</b>                                   | 0.21<br>7.7x10 <sup>-18</sup>  | 1                               |                                 |                               |                                          |                                |                                |                                |      |
| <b>GP14</b>                                  | -0.22<br>3.4x10 <sup>-20</sup> | -0.69<br>2.5x10 <sup>-233</sup> | 1                               |                               |                                          |                                |                                |                                |      |
| <b>GP18</b>                                  | -0.21<br>2.5x10 <sup>-18</sup> | -0.74<br>5.4x10 <sup>-284</sup> | 0.87<br><10 <sup>-300</sup>     | 1                             |                                          |                                |                                |                                |      |
| <b>FBS<sub>total</sub>/F<sub>total</sub></b> | 0.17<br>4.5x10 <sup>-12</sup>  | 0.50<br>8.1x10 <sup>-103</sup>  | -0.73<br>4.8x10 <sup>-273</sup> | -0.76<br><10 <sup>-300</sup>  | 1                                        |                                |                                |                                |      |
| <b>FBS1/FS1</b>                              | 0.16<br>2.2x10 <sup>-11</sup>  | 0.50<br>4.1x10 <sup>-102</sup>  | -0.70<br>7.4x10 <sup>-244</sup> | -0.77<br><10 <sup>-300</sup>  | 0.97<br><10 <sup>-300</sup>              | 1                              |                                |                                |      |
| <b>FBS1/(FS1+FBS1)</b>                       | 0.16<br>2.2x10 <sup>-11</sup>  | 0.50<br>7.0x10 <sup>-104</sup>  | -0.70<br>2.1x10 <sup>-244</sup> | -0.77<br><10 <sup>-300</sup>  | 0.97<br><10 <sup>-300</sup>              | 0.99<br><10 <sup>-300</sup>    | 1                              |                                |      |
| <b>GP6n</b>                                  | 0.20<br>9.8x10 <sup>-17</sup>  | 0.94<br><10 <sup>-300</sup>     | -0.78<br><10 <sup>-300</sup>    | -0.76<br><10 <sup>-300</sup>  | 0.55<br>3.2x10 <sup>-128</sup>           | 0.51<br>3.7x10 <sup>-111</sup> | 0.52<br>9.6x10 <sup>-113</sup> | 1                              |      |
| <b>GP9n</b>                                  | -0.06<br>2.4x10 <sup>-2</sup>  | -0.30<br>8.0x10 <sup>-36</sup>  | 0.1369<br>2.7x10 <sup>-8</sup>  | 0.111<br>2.0x10 <sup>-5</sup> | -0.10<br>2.1x10 <sup>-5</sup>            | -0.08<br>1.1x10 <sup>-3</sup>  | -0.08<br>2.1x10 <sup>-3</sup>  | -0.34<br>2.2x10 <sup>-45</sup> | 1    |

\*GlycA was measured in mmol/L by the NMR metabolomics provider Nightingale inc under the name GP. GlycA has been standardised to have mean 0 and SD 1.

Online Table VII. Association between GP18 and various measures of cholesterol, lipoproteins and triglycerides in serum from TwinsUK females

| Lipid trait                                                      | Beta   | SE    | P                     |
|------------------------------------------------------------------|--------|-------|-----------------------|
| Apolipoprotein A-I                                               | 0.069  | 0.055 | $2.09 \times 10^{-1}$ |
| Apolipoprotein B                                                 | -0.148 | 0.052 | $4.86 \times 10^{-3}$ |
| Concentration of chylomicrons and extremely large VLDL particles | -0.210 | 0.053 | $9.73 \times 10^{-5}$ |
| Concentration of IDL particles                                   | -0.070 | 0.052 | $1.80 \times 10^{-1}$ |
| Concentration of large HDL particles                             | 0.149  | 0.054 | $5.70 \times 10^{-3}$ |
| Concentration of large LDL particles                             | -0.083 | 0.053 | $1.19 \times 10^{-1}$ |
| Concentration of large VLDL particles                            | -0.226 | 0.053 | $2.29 \times 10^{-5}$ |
| Concentration of medium HDL particles                            | 0.093  | 0.050 | $6.36 \times 10^{-2}$ |
| Concentration of medium LDL particles                            | -0.082 | 0.054 | $1.30 \times 10^{-1}$ |
| Concentration of medium VLDL particles                           | -0.228 | 0.052 | $1.56 \times 10^{-5}$ |
| Concentration of small LDL particles                             | -0.089 | 0.053 | $9.23 \times 10^{-2}$ |
| Concentration of small VLDL particles                            | -0.213 | 0.050 | $2.25 \times 10^{-5}$ |
| Concentration of very large HDL particles                        | 0.095  | 0.055 | $8.66 \times 10^{-2}$ |
| Concentration of very large VLDL particles                       | -0.224 | 0.054 | $3.49 \times 10^{-5}$ |
| Concentration of very small VLDL particles                       | -0.149 | 0.049 | $2.64 \times 10^{-3}$ |
| Remnant cholesterol (non-HDL, non-LDL -cholesterol)              | -0.138 | 0.049 | $5.16 \times 10^{-3}$ |
| Sphingomyelins                                                   | -0.045 | 0.058 | $4.41 \times 10^{-1}$ |
| Triglycerides in chylomicrons and extremely large VLDL           | -0.209 | 0.053 | $9.24 \times 10^{-5}$ |
| Triglycerides in HDL                                             | -0.079 | 0.045 | $8.26 \times 10^{-2}$ |
| Triglycerides in IDL                                             | -0.086 | 0.046 | $6.48 \times 10^{-2}$ |
| Triglycerides in large HDL                                       | 0.092  | 0.047 | $4.93 \times 10^{-2}$ |
| Triglycerides in large LDL                                       | -0.060 | 0.047 | $2.07 \times 10^{-1}$ |
| Triglycerides in large VLDL                                      | -0.223 | 0.052 | $1.85 \times 10^{-5}$ |
| Triglycerides in LDL                                             | -0.063 | 0.049 | $1.97 \times 10^{-1}$ |
| Triglycerides in medium HDL                                      | -0.093 | 0.048 | $5.38 \times 10^{-2}$ |
| Triglycerides in medium LDL                                      | -0.038 | 0.050 | $4.51 \times 10^{-1}$ |
| Triglycerides in medium VLDL                                     | -0.227 | 0.051 | $1.31 \times 10^{-5}$ |
| Triglycerides in small LDL                                       | -0.106 | 0.048 | $2.94 \times 10^{-2}$ |



|                                         |        |       |                       |
|-----------------------------------------|--------|-------|-----------------------|
| <b>Triglycerides in small VLDL</b>      | -0.213 | 0.050 | $2.81 \times 10^{-5}$ |
| <b>Triglycerides in very large HDL</b>  | -0.048 | 0.050 | $3.37 \times 10^{-1}$ |
| <b>Triglycerides in very large VLDL</b> | -0.223 | 0.053 | $2.71 \times 10^{-5}$ |
| <b>Triglycerides in very small VLDL</b> | -0.165 | 0.048 | $6.04 \times 10^{-4}$ |
| <b>Triglycerides in VLDL</b>            | -0.197 | 0.048 | $5.10 \times 10^{-5}$ |

**Online Figure I.** Glycan traits significantly associated with 10-years ASCVD risk in females and validation in males.

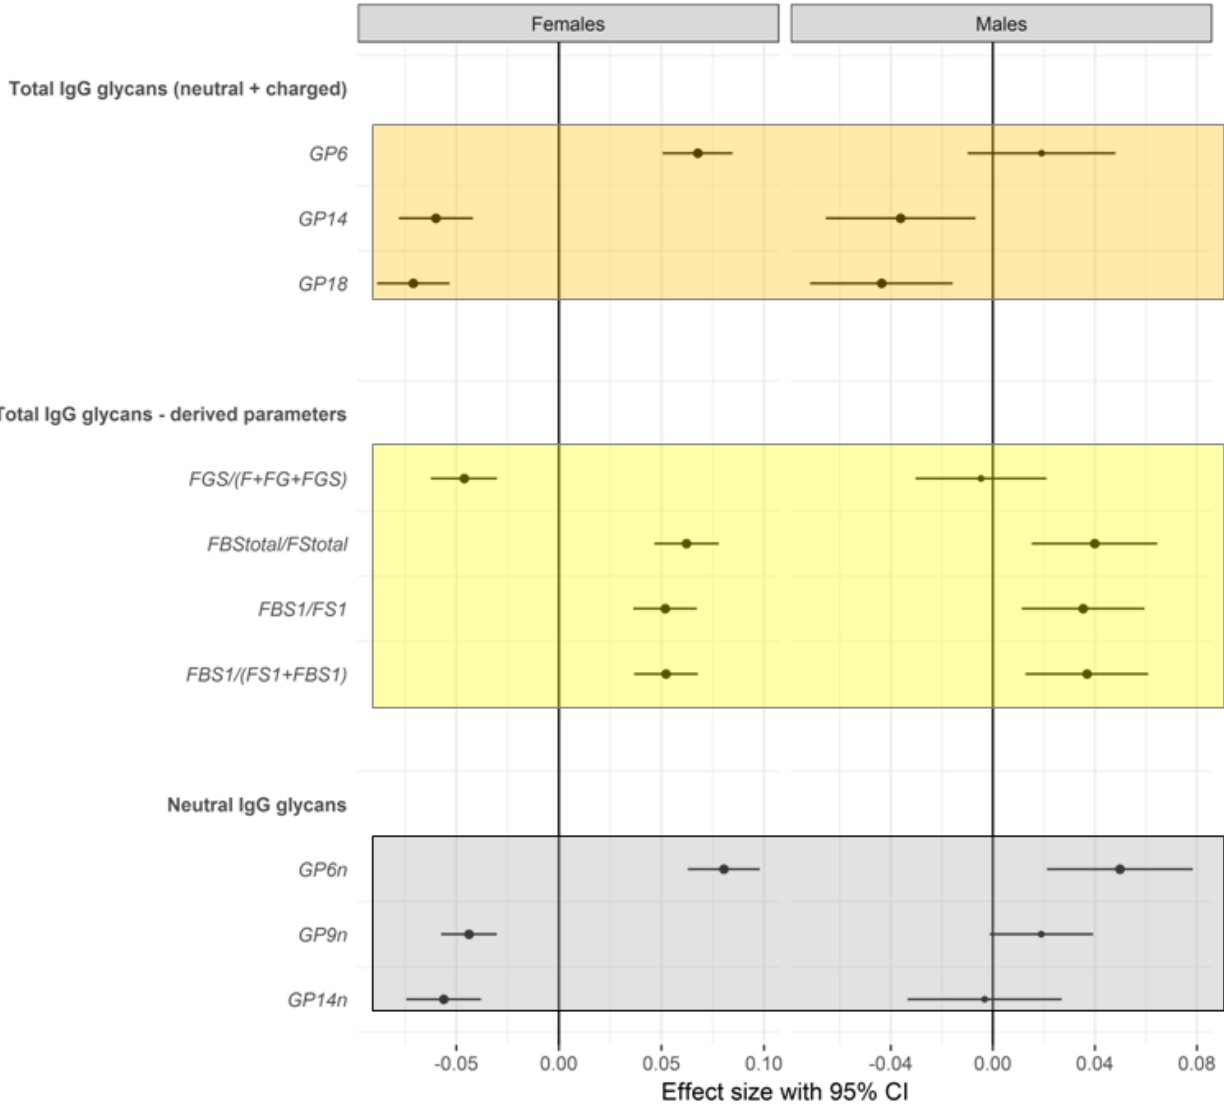

Supplement: res-122-1555-s001.pdf [file res-122-1555-s001.pdf]
